# Supplementary material
Source: MDPI journal article supplement (https://www.mdpi.com/2221-3759/9/4/57)
Supplement: s1 [file s1]

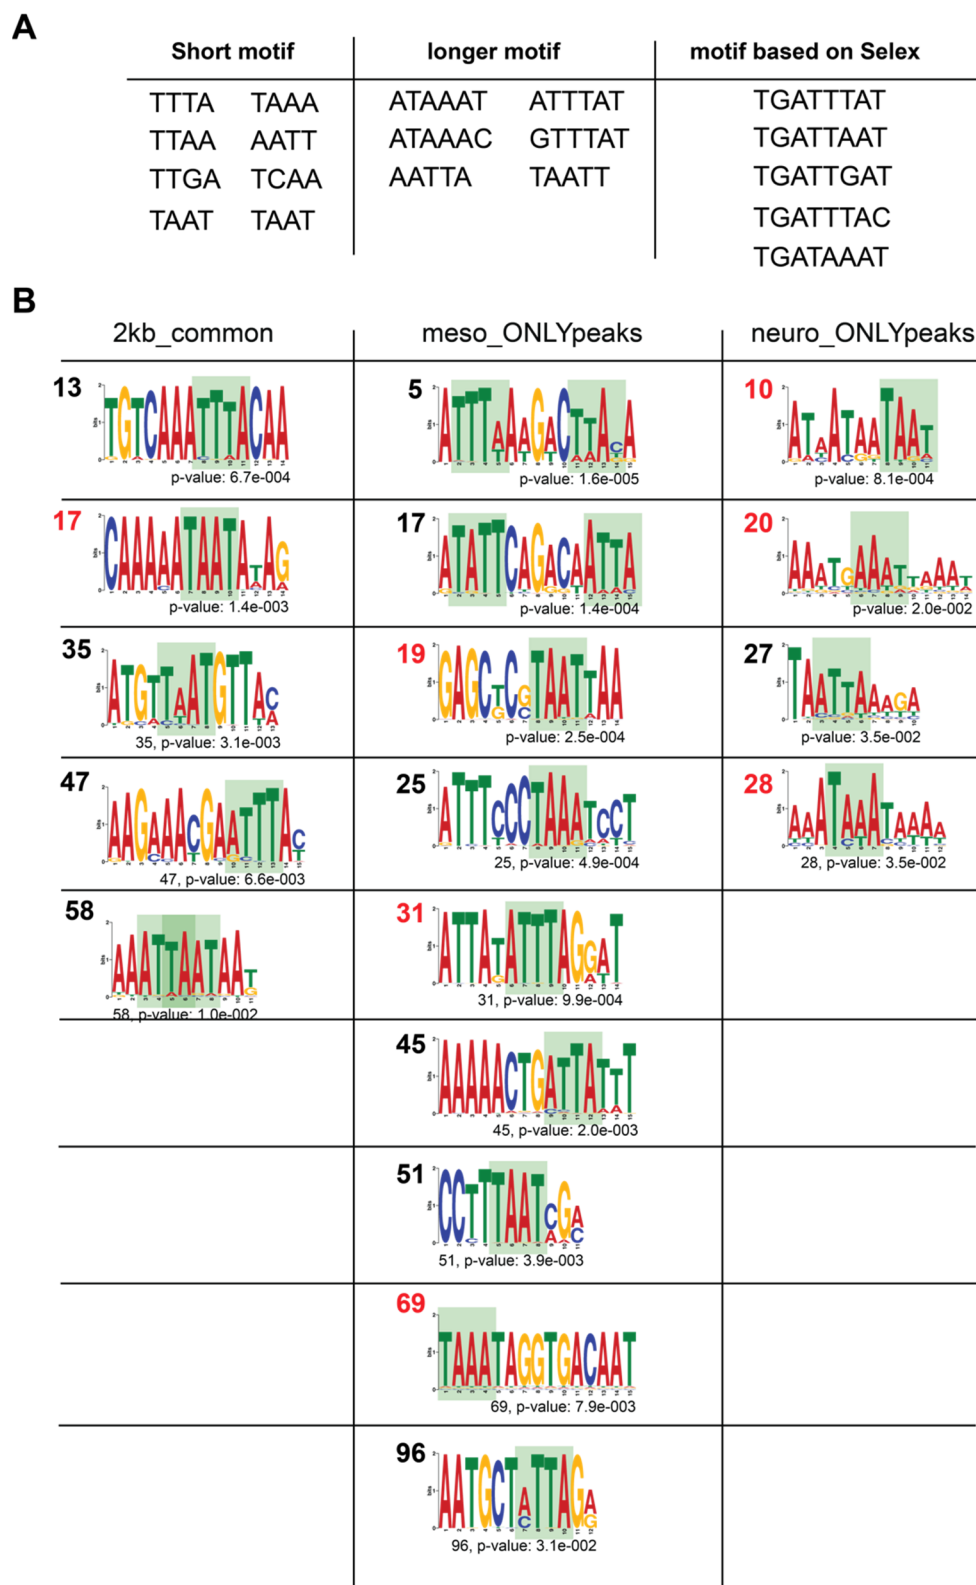

**Figure S1:** Novel motifs identified among different Ubx data sets. **(A)** Table of motifs that served as references to select novel Ubx binding motifs. **(B)** Novel Ubx binding motifs identified by the STREME sub-routine in the MEME suite using different data sets (2kb\_common, meso\_ONLYpeaks, neuro\_ONLYpeaks) as input. Motifs with red labeled numbers were selected for closer analysis. Green boxes highlight the Ubx-like motif.

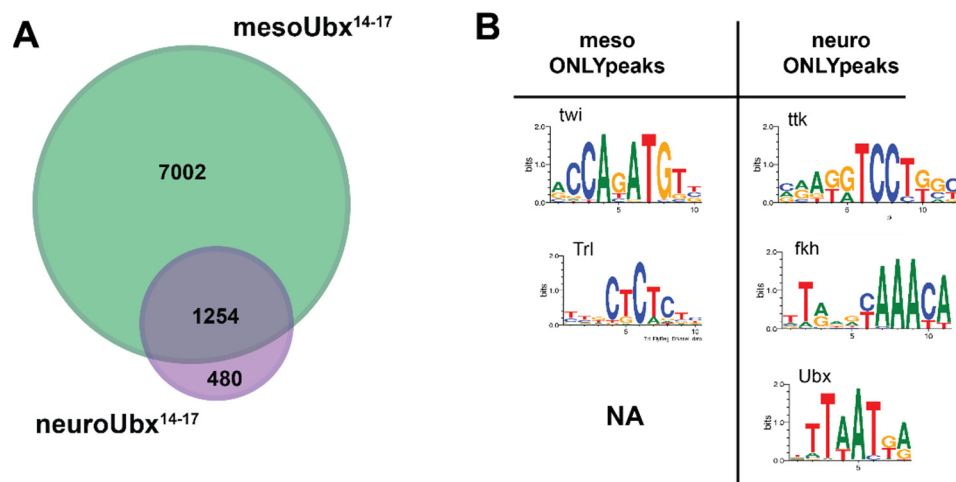

**Figure S2.** Analysis of the Ubx binding behavior during the differentiation stage (stage 14-17). **(A)** Venn diagram of Ubx peaks associated genes in the mesodermal and neuronal tissue, showing a substantial overlap of co-bound and potentially co-regulated genes (common genes). **(B)** Motif search based on an Analysis of Motif Enrichment (AME within the MEME suite) using the sequences from two categories meso\_ONLYpeaks and neuro\_ONLYpeaks derived from the common gene pool. The classical Ubx motif is not found in meso\_ONLYpeaks. NA: not available.

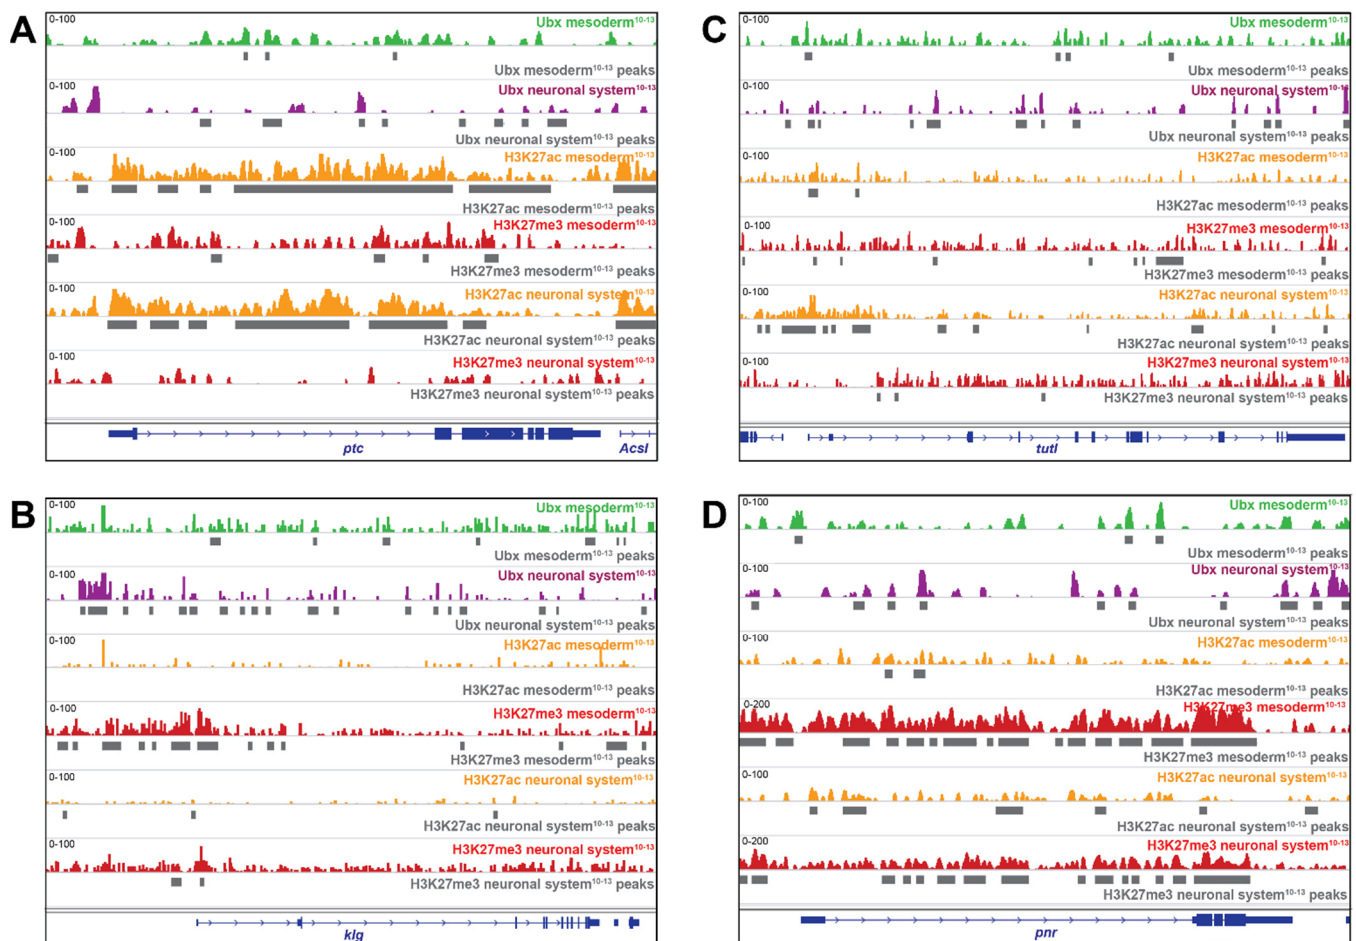

**Figure S3.** Genome view of selected examples to Figure 4. **(A)** Acetylation marks in the mesodermal and neuronal reads within the *patched* (*ptc*) locus. Scale: Ubx and histones 1-100. **(B)** Enriched methylation marks in mesodermal reads within the *klingon* (*klg*) locus. Scale: Ubx and histones 1-100. **(C)** Enriched acetylation marks in neuronal reads within the *turtle* (*tutl*) locus. Scale: Ubx and histones 1-100. **(D)** Methylation marks in neuronal and mesodermal reads within the *pannier* (*pnr*) locus. Scale: Ubx 1:100, acetylations 1-100, methylations 1:200. Genome viewer annotations: Green: Ubx mesodermal reads stages 10-13, purple: Ubx neuronal reads stages 10-13, orange: H3K27ac mesodermal or neuronal reads stages 10-13, red: H3K27me3 mesodermal or neuronal reads stages 10-13, gray boxes: respected accepted peaks, blue: coding region.

**Table S1.** Characterization of the three different categories in Figure 2. Results were obtained from the DiffBind analysis.

|                                                      | <b>mesoSpec</b>                                                                                                     | <b>common genes</b>                                                                             | <b>neuroSpec</b>                                                                                                |
|------------------------------------------------------|---------------------------------------------------------------------------------------------------------------------|-------------------------------------------------------------------------------------------------|-----------------------------------------------------------------------------------------------------------------|
| Category of genes<br>(Enrichment according to WEADE) | Metabolism<br>Trafficking transport<br>Differentiation                                                              | Differentiation<br>Stimulus<br>Signalling pathways                                              | Metabolism<br>Differentiation<br>Stimulus                                                                       |
| Number of peaks                                      | 2589 (single: 931, multiple: 1676)                                                                                  | 11772 (single: 1062, multiple: 10710)                                                           | 4690 (single: 1936, multiple: 2754)                                                                             |
| Location of peaks                                    | Upstream: 42,31<br>Inside: 25,82<br>Downstream: 31,87                                                               | Upstream: 29,99<br>Inside: 49,23<br>Downstream: 20,78                                           | Upstream: 25,53<br>Inside: 57,75<br>Downstream: 16,72                                                           |
| Biological GO-terms (top three hits)                 | Stress response to cadmium ion<br>Epithelial to mesenchymal transition<br>Negative regulation of membrane potential | Mesodermal fate commitment<br>Neuroblast development<br>Negative chemotaxis                     | Anion homeostasis<br>Basement membrane assembly<br>TOR signalling                                               |
| molecular GO-terms (top three hits)                  | Juvenile hormone response element binding<br>Adenosine kinase activity<br>Oxidized DNA binding                      | Cell adhesion molecule binding<br>DNA-binding transcription activator activity<br>Actin binding | ABC-type xenobiotic transporter activity<br>Xenobiotic transmembrane transporter activity<br>Nucleoside binding |
